# Supplementary material for: Mice carrying a complete deletion of the talin2 coding sequence are viable and fertile
Source: PubMed Central journal article supplement (PMC3485561; doi:10.1016/j.bbrc.2012.08.061), 2012-09-21

Fig S1

A

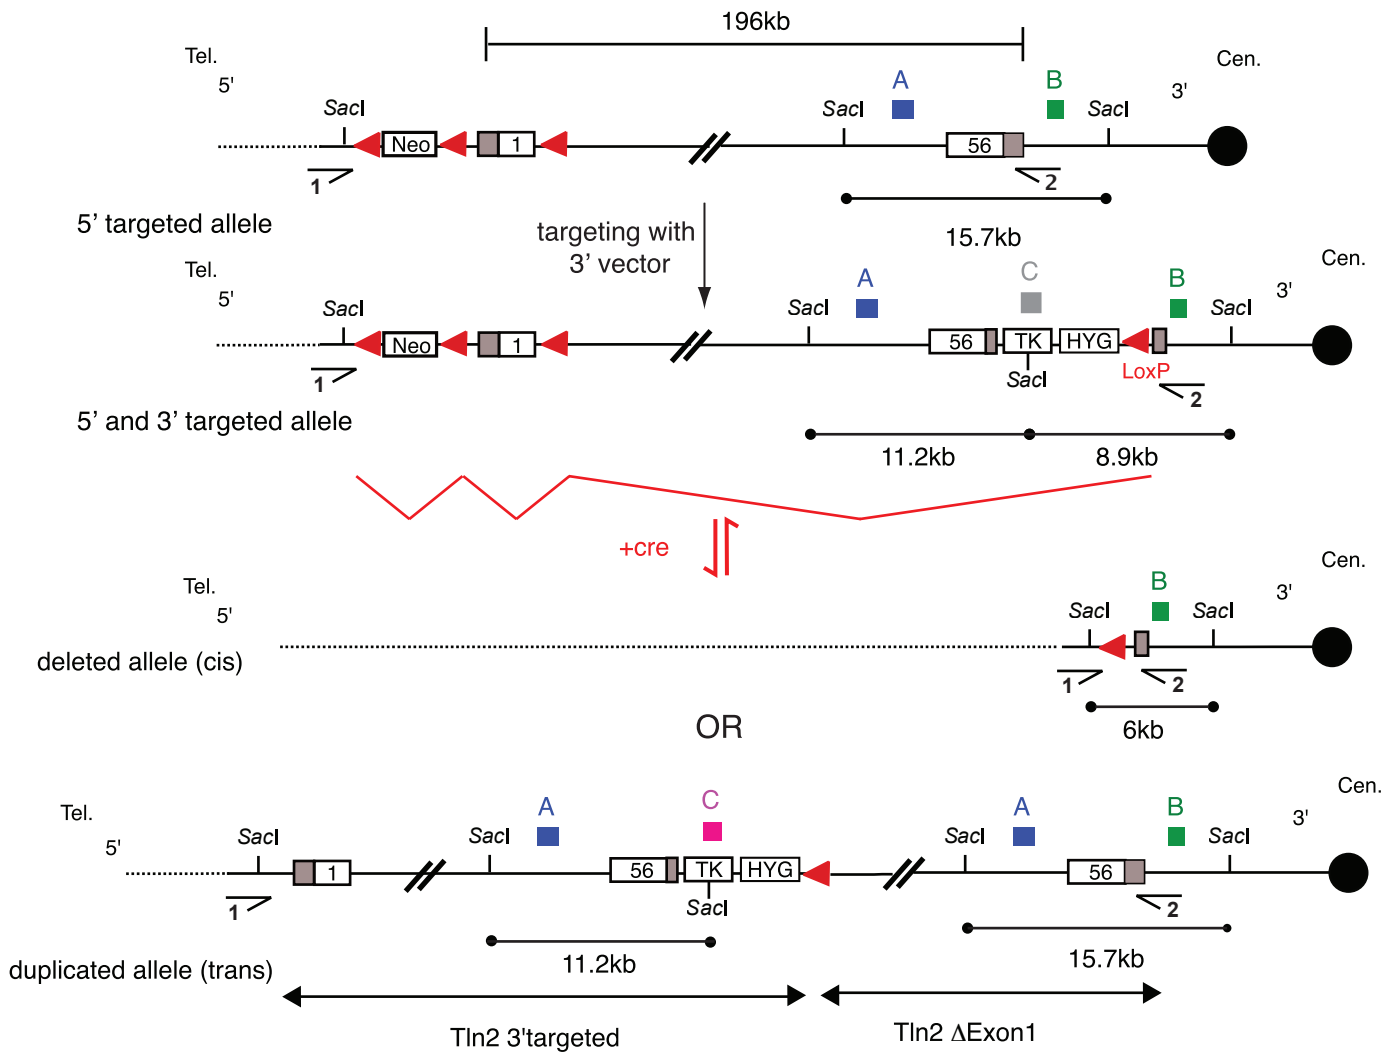

B

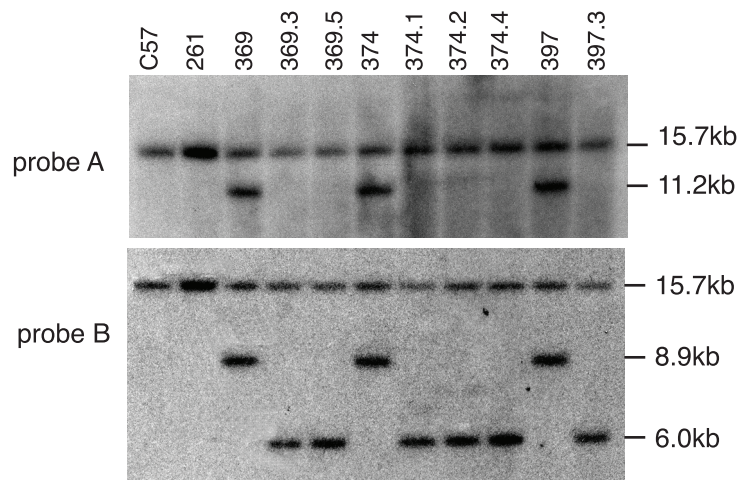

Supplement: mmc1.pdf [file mmc1.pdf]
